# Supplementary material
Source: HighWire-hosted journal article supplement (https://bmjopen.bmj.com/content/9/1/e024121)

## Appendix 1. Intervention development process, informed by the MRC Framework.

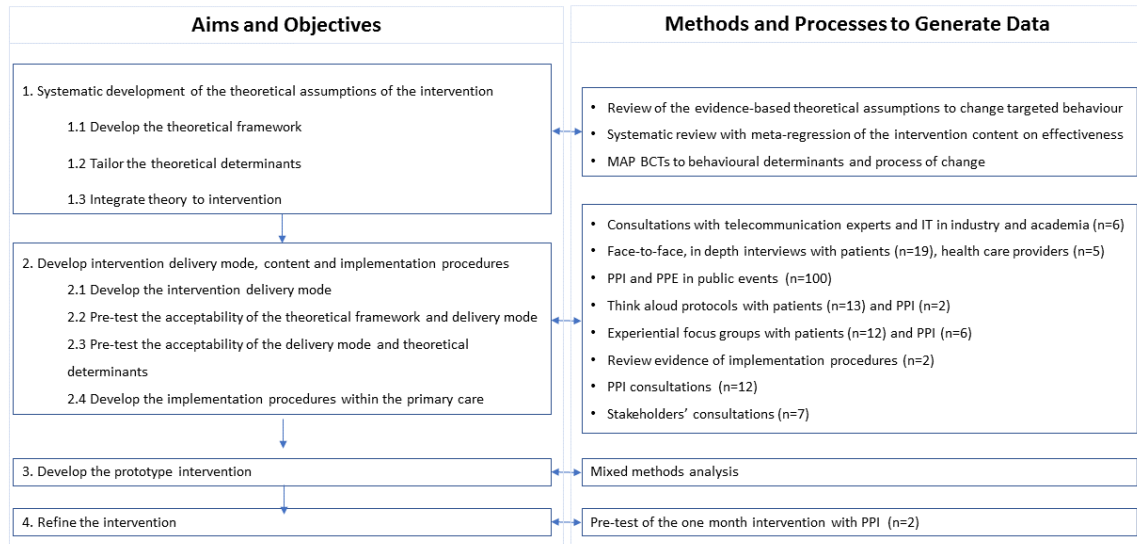

Supplement: inline-supplementary-material-1 [file inline-supplementary-material-1.pdf]
