# Supplementary material
Source: HighWire-hosted journal article supplement (https://bmjopen.bmj.com/content/9/1/e024121)

**Appendix 2.** Intervention piloting process, informed by the MRC framework.

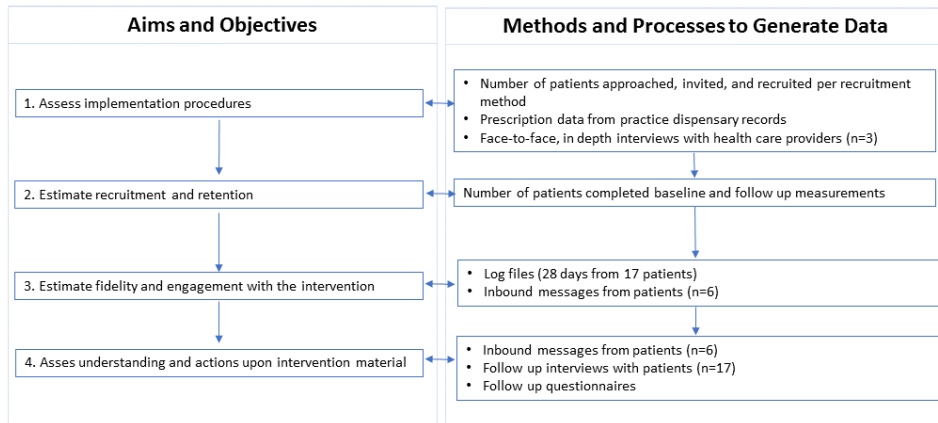

Supplement: inline-supplementary-material-2 [file inline-supplementary-material-2.pdf]
