# Supplementary material
Source: HighWire-hosted journal article supplement (https://bmjopen.bmj.com/content/9/1/e024121)
Supplement: inline-supplementary-material-3 [file inline-supplementary-material-3.pdf]

**Appendix 3.** Map of the BCTs to theoretical determinants and framework.

|                             | Framework                                            | Theoretical Determinant                                 | BCTs                          |
|-----------------------------|------------------------------------------------------|---------------------------------------------------------|-------------------------------|
| PRIMARY DETERMINANTS        | INA                                                  | Beliefs and knowledge                                   | Re-attribution                |
|                             |                                                      |                                                         | Pros and cons                 |
|                             |                                                      |                                                         | Information about antecedents |
|                             |                                                      |                                                         | social comparison             |
|                             |                                                      |                                                         | reduce negative emotions      |
|                             |                                                      |                                                         | normative information         |
|                             | outcome expectations                                 | Information about health consequences                   |                               |
|                             |                                                      | information about emotional consequences                |                               |
|                             |                                                      | Information about social and environmental consequences |                               |
|                             |                                                      | Pros and cons                                           |                               |
| goal setting (behaviour)    |                                                      |                                                         |                               |
| goal setting (outcome)      |                                                      |                                                         |                               |
| self efficacy               | self talk                                            |                                                         |                               |
|                             | Social support (unspecified)                         |                                                         |                               |
|                             | Social support (practical)                           |                                                         |                               |
|                             | Social support (emotional)                           |                                                         |                               |
|                             | feedback on behaviour                                |                                                         |                               |
|                             | reporting whether or not the behaviour was performed |                                                         |                               |
|                             | Problem solving                                      |                                                         |                               |
|                             | action planning/ implementation intentions           |                                                         |                               |
|                             | self monitoring of behaviour                         |                                                         |                               |
|                             | adding objects to the environment                    |                                                         |                               |
|                             | feedback on outcomes of behaviour                    |                                                         |                               |
|                             | biofeedback                                          |                                                         |                               |
|                             | review behaviour goals                               |                                                         |                               |
|                             | review outcome goals                                 |                                                         |                               |
| feedback on emotional state |                                                      |                                                         |                               |
| NINA                        | monitoring of emotional consequences                 |                                                         |                               |
|                             | social reward                                        |                                                         |                               |
|                             | Social support (unspecified)                         |                                                         |                               |
|                             | Social support (practical)                           |                                                         |                               |
|                             | Social support (emotional)                           |                                                         |                               |
|                             | self talk                                            |                                                         |                               |
| habit                       | Prompts/cues                                         |                                                         |                               |
|                             | habit formation                                      |                                                         |                               |
|                             | action planning/ implementation intentions           |                                                         |                               |
|                             | feedback on behaviour                                |                                                         |                               |
|                             | Social reward                                        |                                                         |                               |
| SECONDARY DETERMINANTS      | social support                                       | social comparison                                       |                               |
|                             |                                                      | social reward                                           |                               |
|                             |                                                      | Social support (unspecified)                            |                               |
|                             |                                                      | Social support (practical)                              |                               |
|                             |                                                      | Social support (emotional)                              |                               |
|                             | emotional/ affective state                           | Information about emotional consequences                |                               |
|                             |                                                      | Report emotional state                                  |                               |
|                             |                                                      | Feedback on emotional state                             |                               |
|                             |                                                      | Monitoring of emotional consequences                    |                               |
